# Supplementary material
Source: PubMed Central journal article supplement (PMC5579586)
Supplement: jf7b02557_si_001.pdf [file jf7b02557_si_001.pdf]

**Supplementary Table 1. HLA-DQ2.5-glia- $\alpha$ 1/ $\alpha$ 2-specific T-cell clones and their TCR gene usage**

| DQ2.5-glia- $\alpha$ 1                 | TRAV      | TRAJ  | CDR3 $\alpha$      | TRBV    | TRBJ   | TRBD | CDR3 $\beta$      |
|----------------------------------------|-----------|-------|--------------------|---------|--------|------|-------------------|
| S2                                     | 4*01      | 4*01  | CLVGDGGSFSGGYNKLIF | 20-1*01 | 2-5*01 | 2*01 | CSAGVGGQETQYF     |
| L5107                                  | 24*01     | 53*01 | CAFIGGSNYKLTF      | 20-1*01 | 2-2*01 | 1*01 | CSAREPDNTGELFF    |
| L6                                     | 21*01     | 57*01 | CAVTLGGGSEKLVF     | 5-5*01  | 1-1*01 | 1*01 | CASSFSPAGSEAFF    |
| L10                                    | 8-3*01    | 44*01 | CAVGWEDGTASKLTF    | 20-1*01 | 2-3*01 | 2*02 | CSASRWRSTDTQYF    |
| <b>DQ2.5-glia-<math>\alpha</math>2</b> |           |       |                    |         |        |      |                   |
| S16                                    | 26-1*01   | 32*01 | CIVWGGATNKLIF      | 7-2*01  | 2-3*01 |      | CASSVRSTDTQYF     |
| D1                                     | 8-3*01    | 42*01 | CAVGRGGSQGNLIF     | 4-2*01  | 2-1*01 | 1*01 | CASSYQSLVRGNNEQFF |
| 101136                                 | 26-1*01   | 20*01 | CIVHNDYKLSF        | 7-2*01  | 2-3*01 | 1*01 | CASSIRSTDTQYF     |
| L3-13                                  | 14/DV4*03 | 40*01 | CAMSVLSGTYKYIF     | 4-1*01  | 2-5*01 | 1*01 | CASSHVDRGGETQYF   |

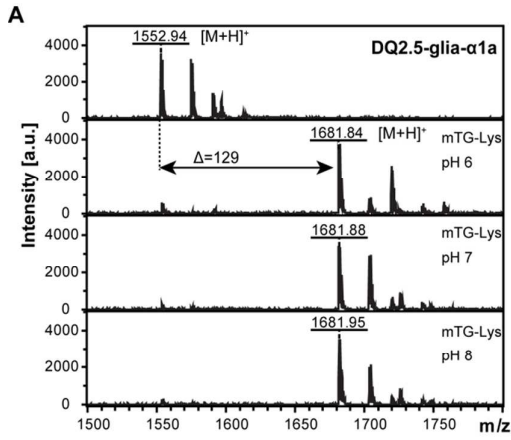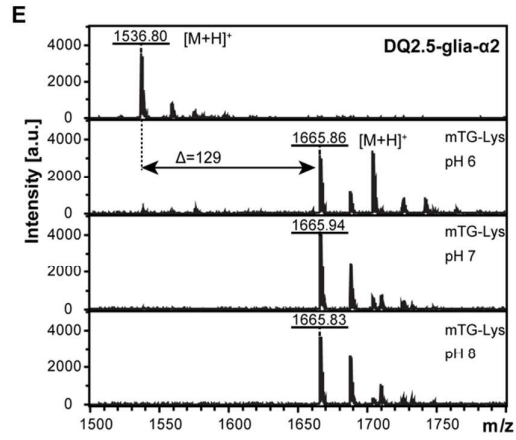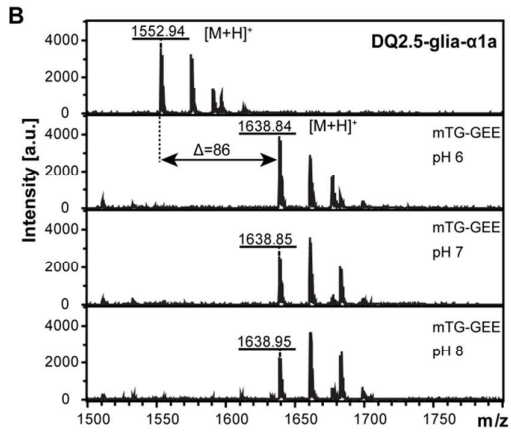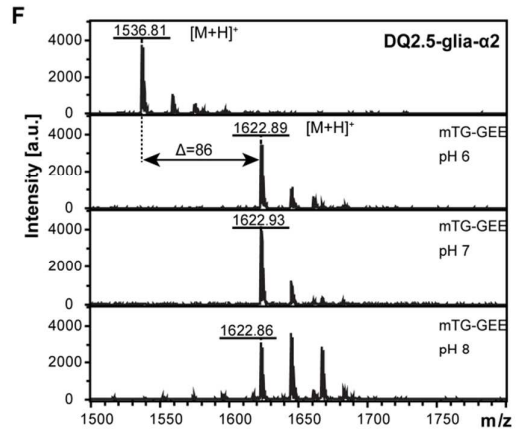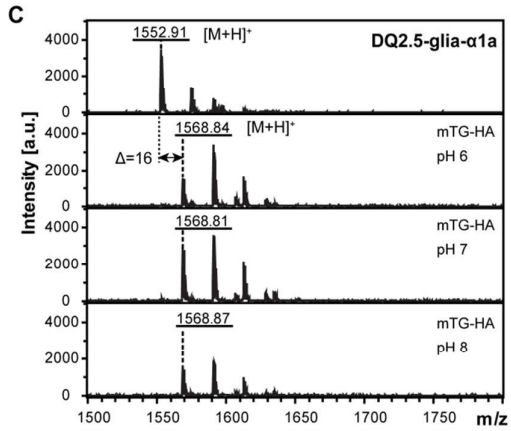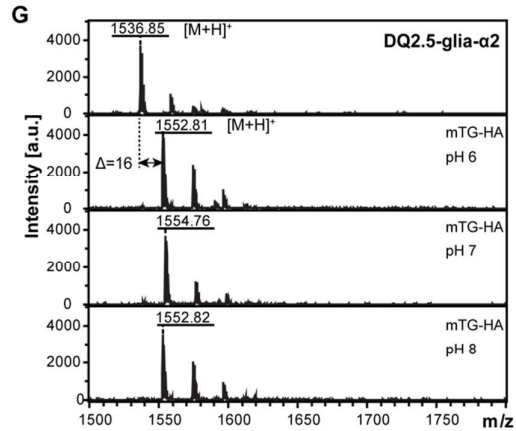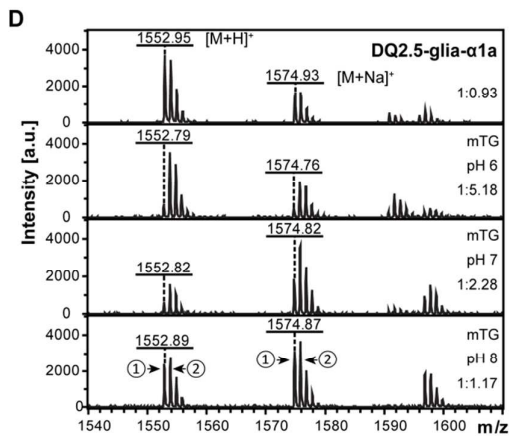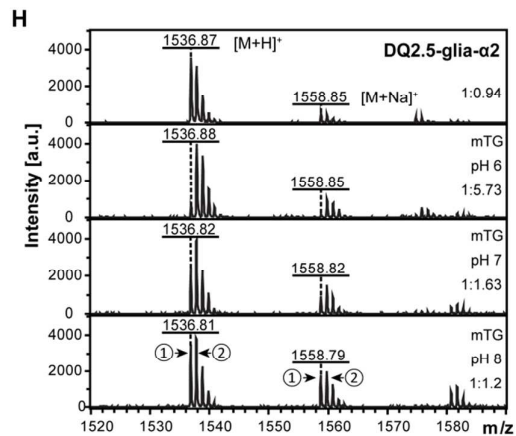

Supplementary Figure 1. Effect of pH on transamidation and deamidation of DQ 2.5-glia- $\alpha$ 1a and DQ 2.5-glia- $\alpha$ 2 peptides. (A) Effect of pH on DQ 2.5-glia- $\alpha$ 1a reaction induced by mTG in presence of Lys. (B) Effect of pH on DQ 2.5-glia- $\alpha$ 1a reaction induced by mTG in presence of GEE. (C) Effect of pH on DQ 2.5-glia- $\alpha$ 1a reaction induced by mTG in presence of Lys. (D) Effect of pH on DQ 2.5-glia- $\alpha$ 1a reaction induced by mTG without acyl-acceptor. (E) Effect of pH on DQ 2.5-glia- $\alpha$ 2 reaction induced by mTG in presence of Lys. (F) Effect of pH on DQ 2.5-glia- $\alpha$ 2 reaction induced by mTG in presence of GEE. (G) Effect of pH on DQ 2.5-glia- $\alpha$ 2 reaction induced by mTG in presence of Lys. (H) Effect of pH on DQ 2.5-glia- $\alpha$ 2 reaction induced by mTG without acyl-acceptor. All of presented molecular mass is monoisotopic mass. Peak area ratio in (D) and (H) is peak1: peak2 (peak1= ① + ① and peak 2= ② + ②). The deamidation of Q $\rightarrow$ E would be present a 1 Dalton shift, namely peak ① shifted to peak ②. Regarding DQ 2.5-glia- $\alpha$  1a peptide (supplementary Figure 1D), the area ratio between peak 1 (peak ①+ peak ①) and peak 2 (peak ②+ peak ②) was 1:5.18 (pH 6), whereas that was 1:2.28 (pH 7), 1:1.17 (pH 8) and 1:0.93 (native peptide). Simultaneously, for the DQ 2.5-glia- $\alpha$ 2 peptide (supplementary Figure 1H), the area ratio between peak 1 and peak 2 increased in pace with the ascent of pH, which was 1:5.73 (pH 6), 1:1.63 (pH 7) and 1:1.2 (pH 8). The intensity ratio between peak 1 and peak 2 was similar to the area ration between them (data not shown).

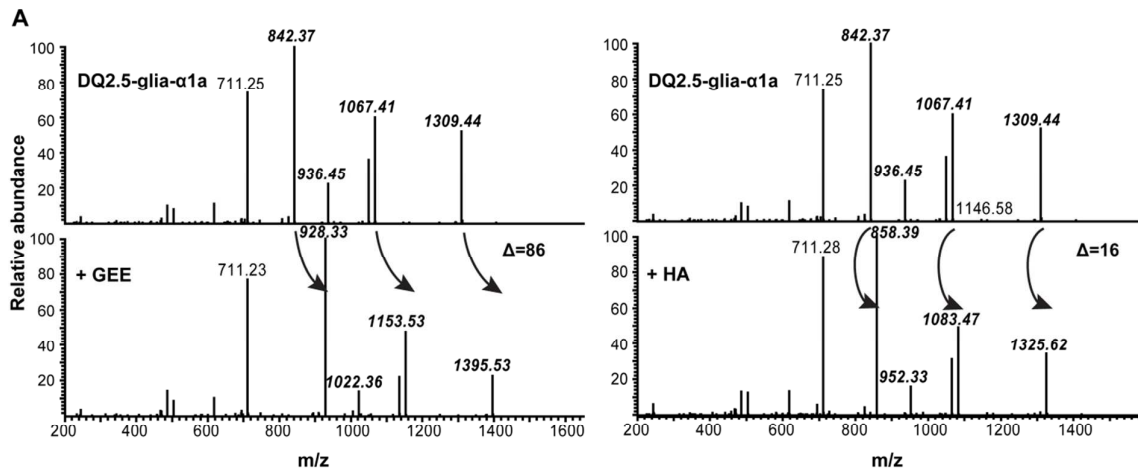

|                                  |        |         |         |         |                |         |               |                |         |         |                |         |        |
|----------------------------------|--------|---------|---------|---------|----------------|---------|---------------|----------------|---------|---------|----------------|---------|--------|
| <i>b</i> -HA [M+H] <sup>+</sup>  | 114.09 | 242.15  | 339.20  | 486.27  | 583.32         | 711.38  | 808.44        | <b>952.49</b>  | 1065.57 | 1162.63 | <b>1325.69</b> | 1422.74 | -      |
| <i>b</i> -GEE [M+H] <sup>+</sup> | 114.09 | 242.15  | 339.20  | 486.27  | 583.32         | 711.38  | 808.44        | <b>1022.53</b> | 1135.61 | 1232.67 | <b>1395.73</b> | 1492.78 | -      |
| <i>b</i> [M+H] <sup>+</sup>      | 114.09 | 242.15  | 339.20  | 486.27  | 583.32         | 711.38  | 808.44        | <b>936.49</b>  | 1049.58 | 1146.63 | <b>1309.69</b> | 1406.70 | -      |
|                                  | 1      | 2       | 3       | 4       | 5              | 6       | 7             | 8              | 9       | 10      | 11             | 12      | 13     |
|                                  | L      | Q       | P       | F       | P              | Q       | P             | <b>Q</b>       | L       | P       | Y              | P       | Q      |
|                                  | 13     | 12      | 11      | 10      | 9              | 8       | 7             | 6              | 5       | 4       | 3              | 2       | 1      |
| <i>y</i> [M+H] <sup>+</sup>      | -      | 1439.73 | 1311.67 | 1214.62 | <b>1067.55</b> | 970.50  | <b>842.44</b> | 745.39         | 617.33  | 504.25  | 407.19         | 244.13  | 147.08 |
| <i>y</i> -GEE [M+H] <sup>+</sup> | -      | 1525.77 | 1397.71 | 1300.66 | <b>1153.59</b> | 1056.54 | <b>928.48</b> | 831.42         | 617.33  | 504.25  | 407.19         | 244.13  | 147.08 |
| <i>y</i> -HA [M+H] <sup>+</sup>  | -      | 1455.73 | 1327.67 | 1230.62 | <b>1083.55</b> | 986.49  | <b>858.44</b> | 761.38         | 617.33  | 504.25  | 407.19         | 244.13  | 147.08 |

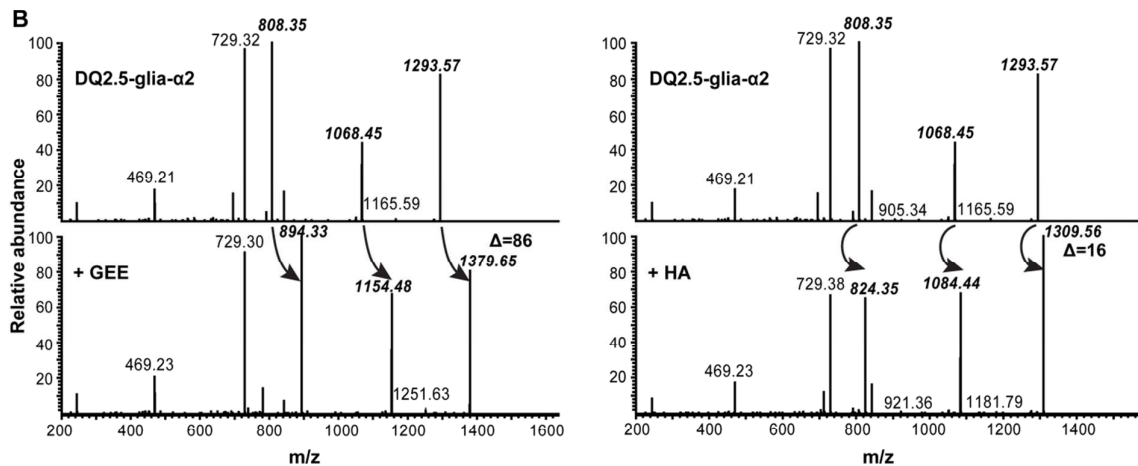

|                                  |       |         |         |         |         |          |               |        |                |         |                |         |        |
|----------------------------------|-------|---------|---------|---------|---------|----------|---------------|--------|----------------|---------|----------------|---------|--------|
| <i>b</i> -HA [M+H] <sup>+</sup>  | 98.06 | 245.13  | 342.18  | 470.24  | 567.29  | 711.35   | <b>824.43</b> | 921.48 | <b>1084.55</b> | 1181.60 | <b>1309.66</b> | 1406.71 | -      |
| <i>b</i> -GEE [M+H] <sup>+</sup> | 98.06 | 245.13  | 342.18  | 470.24  | 567.29  | 781.39   | <b>894.47</b> | 991.52 | <b>1154.59</b> | 1251.64 | <b>1379.70</b> | 1476.75 | -      |
| <i>b</i> [M+H] <sup>+</sup>      | 98.06 | 245.13  | 342.18  | 470.24  | 567.29  | 695.35   | <b>808.44</b> | 905.49 | <b>1068.55</b> | 1165.60 | <b>1293.66</b> | 1390.72 | -      |
|                                  | 1     | 2       | 3       | 4       | 5       | 6        | 7             | 8      | 9              | 10      | 11             | 12      | 13     |
|                                  | P     | F       | P       | Q       | P       | <b>Q</b> | L             | P      | Y              | P       | Q              | P       | Q      |
|                                  | 13    | 12      | 11      | 10      | 9       | 8        | 7             | 6      | 5              | 4       | 3              | 2       | 1      |
| <i>y</i> [M+H] <sup>+</sup>      | -     | 1439.73 | 1292.66 | 1195.61 | 1067.55 | 970.50   | 842.44        | 729.36 | 632.30         | 469.24  | 372.19         | 244.13  | 147.08 |
| <i>y</i> -GEE [M+H] <sup>+</sup> | -     | 1525.77 | 1378.70 | 1281.65 | 1153.59 | 1056.54  | 842.44        | 729.36 | 632.30         | 469.24  | 372.19         | 244.13  | 147.08 |
| <i>y</i> -HA [M+H] <sup>+</sup>  | -     | 1455.73 | 1308.66 | 1211.61 | 1083.55 | 986.49   | 842.44        | 729.36 | 632.30         | 469.24  | 372.19         | 244.13  | 147.08 |

Supplementary Figure 2. Identification of transamidated sites induced by mTG using LTQ-FT Ultra.

(A) Observed fragment of DQ 2.5-glia- $\alpha$ 1a before treatment (upper spectrum), after treatment with

mTG in presence of GEE (left lower spectrum) and HA (right lower spectrum); predicted fragment ion masses in the table. Ions illustrating transamidation of the Q at position 8. (B) Observed fragment of DQ 2.5-glia- $\alpha$ 2 before treatment (upper spectrum), after treatment with mTG in presence of GEE (left lower spectrum) and HA (right lower spectrum); predicted fragment ion masses in the table. Ions illustrating transamidation of the Q at position 6. All of presented molecular mass is accurate mass. Arrows indicate the Da shift due to transamidation.

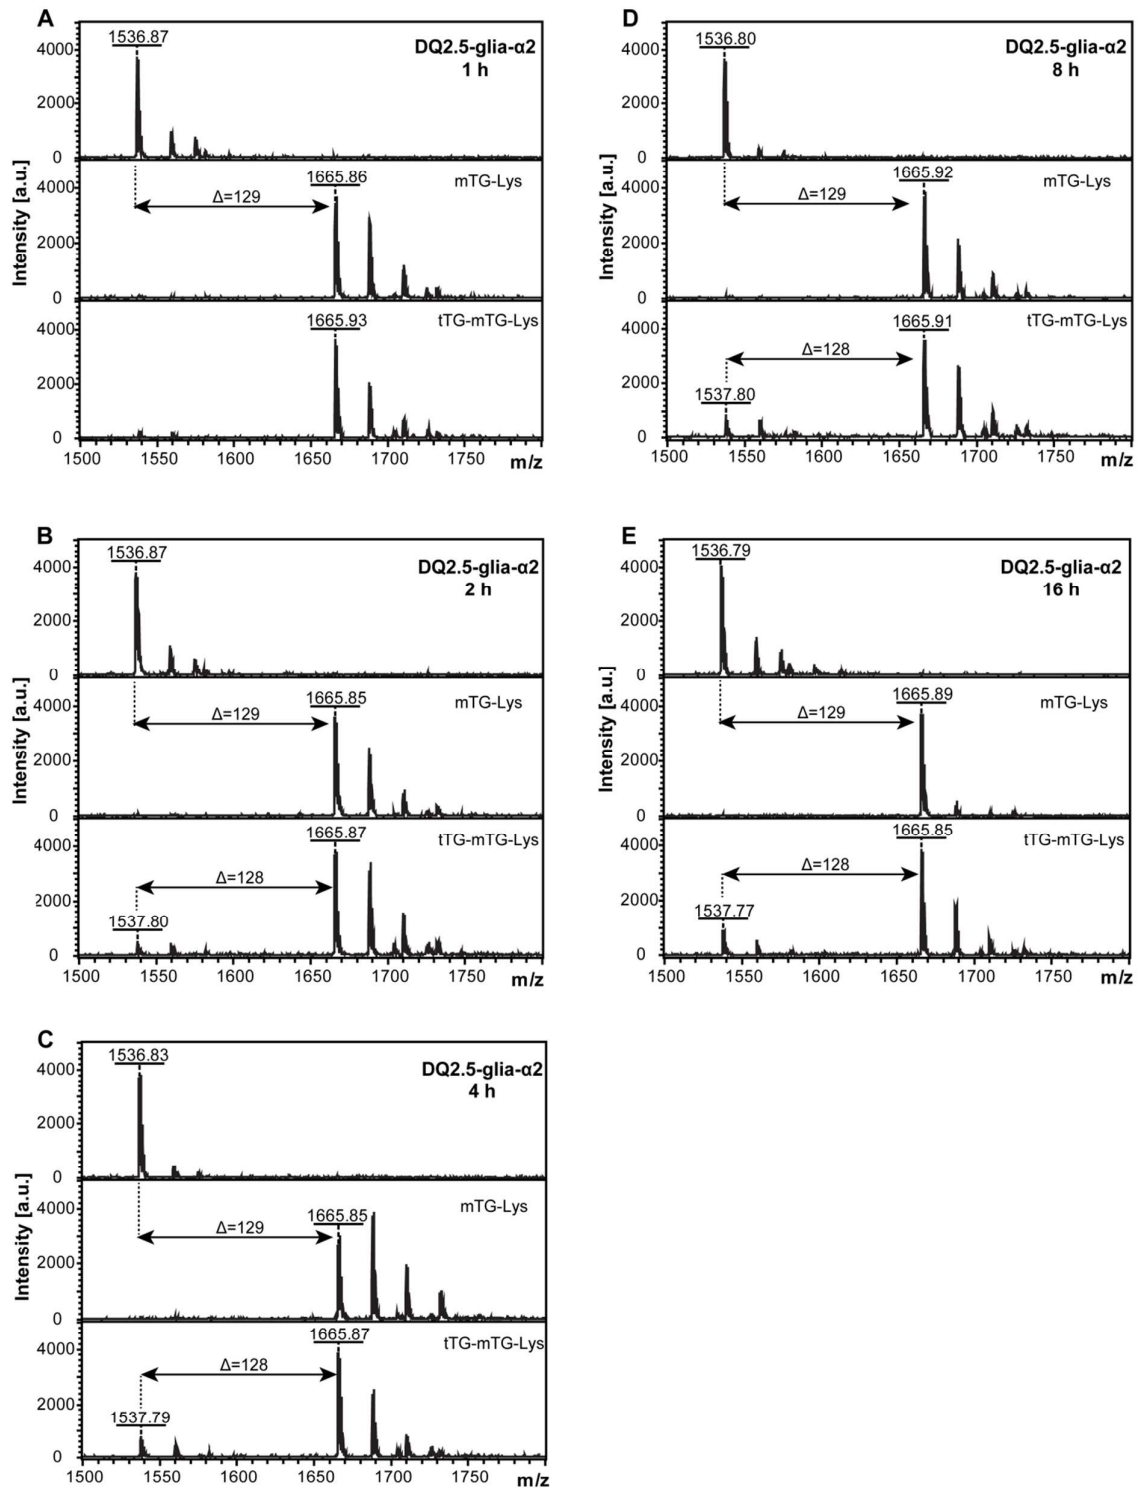

Supplementary Figure 3. Identification of tTG-mediated deamidation of transamidated DQ2.5-glia- $\alpha$ 2 by MALDI-TOF. (A) Mass spectrum of treatment for 1 h at 37 °C. DQ2.5-glia- $\alpha$ 2 (upper panel), DQ2.5-glia- $\alpha$ 2 after mTG transamidation with Lys (mTG-Lys, middle panel, absence of tTG), and

after tTG treatment of Lys transamidated DQ2.5-glia- $\alpha$ 2 (tTG-mTG-Lys, lower panel, with tTG). (B) Mass spectrum of treatment for 2 h at 37 °C. (C) Mass spectrum of treatment for 4 h at 37 °C. (D) Mass spectrum of treatment for 8 h at 37 °C. (E) Mass spectrum of treatment for 16 h at 37 °C. Arrows indicate the Da shift.

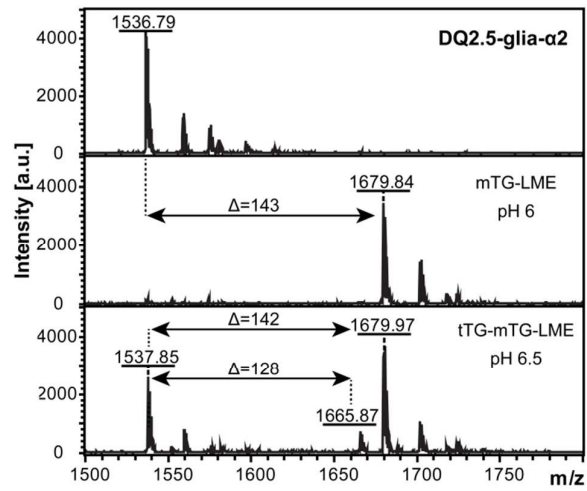

Supplementary Figure 4. Transamidation of DQ2.5-glia- $\alpha$ 2 with LME and effect of tTG treatment of transamidated peptide. Mass spectrum of DQ2.5-glia- $\alpha$ 2 (upper panel), DQ2.5-glia- $\alpha$ 2 after mTG transamidation with LME (mTG-LME, middle panel), and after tTG treatment of LME transamidated DQ2.5-glia- $\alpha$ 2 (tTG-mTG-Lys, lower panel).



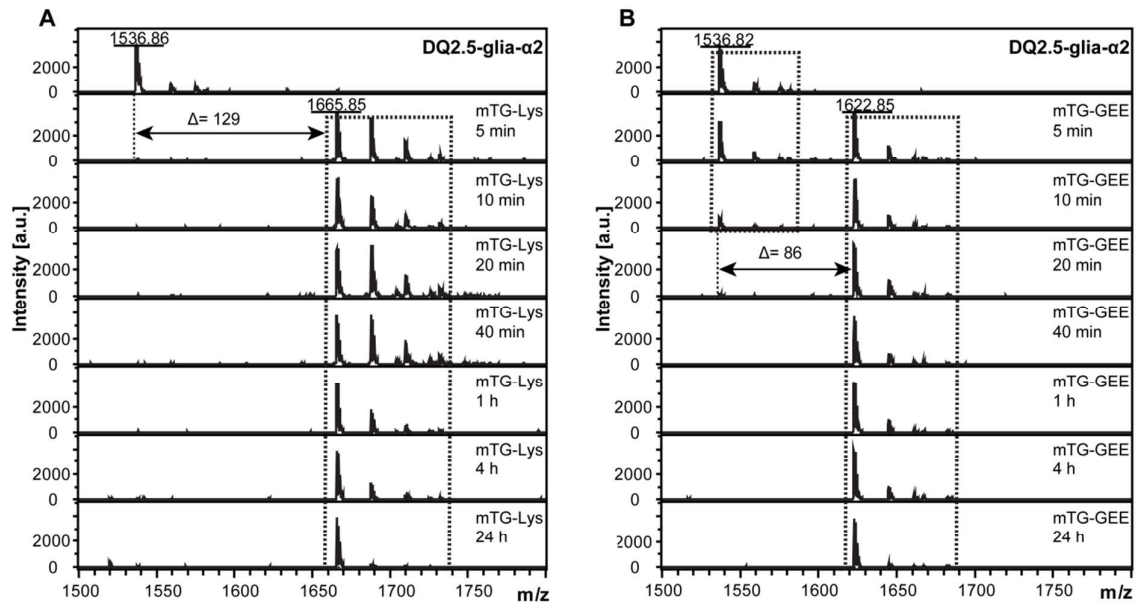

Supplementary Figure 5. Time-tracking of mTG transamidation by MALDI-TOF. (A) mTG mediated transamidation in presence of Lys at 5 min, 10 min, 20 min, 40 min, 1 h, 4 h and 24 h. (B) mTG mediated transamidation in presence of GEE at 5 min, 10 min, 20 min, 40 min, 1 h, 4 h and 24 h. All of presented molecular masses are accurate mass. Arrows indicate the Da shift due to transamidation.

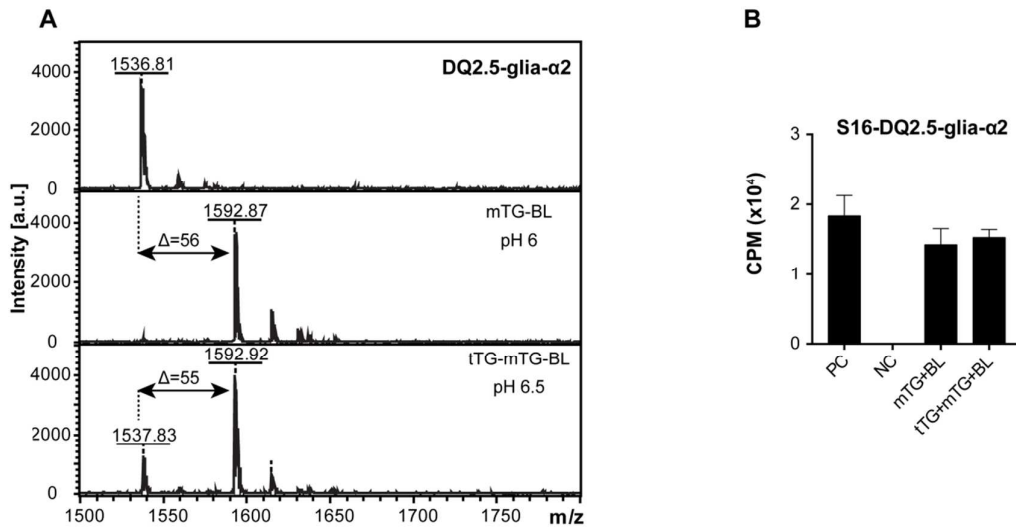

Supplementary Figure 6. Transamidation of DQ2.5-glia- $\alpha$ 2 with BL and reactivity pattern of glia- $\alpha$ 2-specific-T-cell clone to mTG-treated and tTG-mTG treated peptide. (A) Mass spectrum of DQ2.5-glia- $\alpha$ 2 (upper panel), DQ2.5-glia- $\alpha$ 2 after mTG transamidation with BL (mTG-BL, middle panel), and after tTG treatment of BL transamidated DQ2.5-glia- $\alpha$ 2 (tTG-mTG-BL, lower panel). (B) Reactivity pattern of glia- $\alpha$ 2-specific T-cell clone S16 to DQ2.5-glia- $\alpha$ 2 (left panel), before (NC) and after mTG transamidation with BL (mTG-BL) and after tTG treatment of mTG-BL (tTG-mTG-BL). All of presented molecular mass is accurate mass. Arrows indicate the Da shift.
